# Supplementary material for: Limited options for low-global-warming-potential refrigerants
Source: PubMed Central journal article supplement (PMC5321723; doi:10.1038/ncomms14476), 2017-02-17
Supplement: ncomms14476-s1.pdf [file ncomms14476-s1.pdf]

**Supplementary Table 1. Full list of candidates from PubChem screening with  $GWP_{100} < 1000$  and  $300\text{ K} < T_{\text{crit}} < 420\text{ K}$  and results of simulation in the ideal vapor compression cycle.** Listed are the PubChem compound identification number, chemical name and structure, ASHRAE refrigerant designation (where applicable),  $GWP_{100}$  (estimated by the method of Kazakov *et al.*<sup>1</sup> unless noted), estimated or literature value of critical temperature, coefficient of performance and volumetric capacity in the ideal vapor compression cycle with temperatures representative of an air-conditioning application, and comments denoting reason for including or deleting compound from further consideration. (A notation of “toxic” or “unstable” indicates that the fluid was dropped based on published data.) The fluids are grouped by chemical class and, within classes, listed in order of increasing critical temperature.

| PubChem Number                                     | IUPAC Name                                           | Structure                                            | ASHRAE Designation | $GWP_{100}$ | $T_{\text{crit}}/\text{K}$ | COP  | $Q_{\text{vol}}/\text{MJ}\cdot\text{m}^{-3}$ | Comments                                         |
|----------------------------------------------------|------------------------------------------------------|------------------------------------------------------|--------------------|-------------|----------------------------|------|----------------------------------------------|--------------------------------------------------|
| <b>Hydrocarbons</b>                                |                                                      |                                                      |                    |             |                            |      |                                              |                                                  |
| 6324                                               | ethane                                               | $\text{CH}_3\text{-CH}_3$                            | R-170              | 6*          | 305.3†                     | ‡    |                                              | transcritical, blend comp.                       |
| 6326                                               | ethyne (acetylene)                                   | $\text{CH}\equiv\text{CH}$                           |                    | 19          | 320.3                      | 6.03 | 11.26                                        | unstable, drop                                   |
| 8252                                               | propene (propylene)                                  | $\text{CH}_2=\text{CH-CH}_3$                         | R-1270             | 2*          | 364.2†                     | 7.77 | 4.60                                         | retain                                           |
| 6334                                               | propane                                              | $\text{CH}_3\text{-CH}_2\text{-CH}_3$                | R-290              | 3*          | 369.9†                     | 7.81 | 3.84                                         | retain                                           |
| 6335                                               | prop-1-yne                                           | $\text{CH}_3\text{-C}\equiv\text{CH}$                |                    | 2           | 387.4                      | 8.29 | 3.05                                         | see main text                                    |
| 6351                                               | cyclopropane                                         | $\text{c-CH}_2\text{-CH}_2\text{-CH}_2\text{-}$      | R-C270             | 86          | 398.3†                     | 8.30 | 3.33                                         | 3-mem ring, but stable                           |
| 6360                                               | 2-methylpropane (isobutane)                          | $(\text{CH}_3)_2\text{-CH}_2\text{-CH}_3$            | R-600a             | 4           | 407.8†                     | 8.13 | 1.59                                         | low $Q_{\text{vol}}$ , drop                      |
| 123173                                             | cyclopropene                                         | $\text{c-CH}_2\text{-CH=CH-}$                        |                    | <1          | 419.5                      | 8.50 | 1.59                                         | unstable, low $Q_{\text{vol}}$ , drop            |
| <b>Hydrofluorocarbons (HFCs)</b>                   |                                                      |                                                      |                    |             |                            |      |                                              |                                                  |
| 11638                                              | fluoromethane                                        | $\text{CH}_3\text{F}$                                | R-41               | 116*        | 317.3†                     | ‡    |                                              | blend component, retain                          |
| 6345                                               | difluoromethane                                      | $\text{CH}_2\text{F}_2$                              | R-32               | 677*        | 351.3†                     | 7.68 | 7.29                                         | retain                                           |
| 9620                                               | fluoroethane                                         | $\text{CH}_2\text{F-CH}_3$                           | R-161              | 4*          | 375.3†                     | 8.07 | 4.12                                         | retain                                           |
| 6368                                               | 1,1-difluoroethane                                   | $\text{CHF}_2\text{-CH}_3$                           | R-152a             | 138*        | 386.4†                     | 8.22 | 2.82                                         | retain                                           |
| 9667                                               | 1,1,2,2-tetrafluoroethane                            | $\text{CHF}_2\text{-CHF}_2$                          | R-134              | 1120*       | 391.8†                     | 8.16 | 2.48                                         | blend component, retain                          |
| 12584494                                           | 1-(difluoromethyl)-1,2,2,3,3-pentafluorocyclopropane | $\text{CHF}_2\text{-(-CF-CF}_2\text{-CF}_2\text{-)}$ |                    | 156         | 405.5                      | 7.77 | 1.05                                         | low $Q_{\text{vol}}$ , drop                      |
| <b>Hydrofluoroolefins (HFOs) and Fluoroolefins</b> |                                                      |                                                      |                    |             |                            |      |                                              |                                                  |
| 8301                                               | 1,1,2,2-tetrafluoroethene                            | $\text{CF}_2=\text{CF}_2$                            | R-1114             | 6           | 308.4                      | ‡    |                                              | toxic, transcritical, drop                       |
| 6369                                               | 1,1-difluoroethene                                   | $\text{CF}_2=\text{CH}_2$                            | R-1132a            | <1*         | 324.2                      | 6.33 | 7.40                                         | toxic                                            |
| 6339                                               | fluoroethene                                         | $\text{CHF}=\text{CH}_2$                             | R-1141             | <1*         | 327.1§                     | 6.62 | 8.52                                         | retain                                           |
| 9665                                               | 1,1,2-trifluoroethene                                | $\text{CF}_2=\text{CHF}$                             | R-1123             | 3           | 343.0§                     | 7.11 | 5.57                                         | commercial interest                              |
| 8302                                               | 1,1,2,3,3,3-hexafluoroprop-1-ene                     | $\text{CF}_2=\text{CF-CF}_3$                         | R-1216             | 9           | 359.0                      | 7.25 | 2.65                                         | toxic                                            |
| 2776731                                            | 2,3,3,3-tetrafluoroprop-1-ene                        | $\text{CH}_2=\text{CF-CF}_3$                         | R-1234yf           | <1*         | 367.9†                     | 7.63 | 2.79                                         | commercialized                                   |
| 5365501                                            | (E)-1,2-difluoroethene                               | $\text{CHF}=\text{CHF}$                              | R-1132(E)          | 1           | 370.5§                     | 8.06 | 4.07                                         | retain                                           |
| 12672                                              | 3,3,3-trifluoroprop-1-ene                            | $\text{CH}_2=\text{CH-CF}_3$                         | R-1243zf           | <1*         | 376.9†                     | 7.93 | 2.57                                         | retain, but tox concerns                         |
| 14310966                                           | 1,1,2-trifluoroprop-1-ene                            | $\text{CF}_2=\text{CF-CH}_3$                         | R-1243yc           | 5           | 379.0                      | 7.96 | 2.42                                         | $\text{CF}_2$ alert, drop                        |
| 59951260                                           | (E)-1,2-difluoroprop-1-ene                           | $\text{CHF}=\text{CF-CH}_3$                          | R-1252ye(E)        | 2           | 380.7                      | 8.08 | 2.48                                         | retain                                           |
| 16719786                                           | (Z)-1,2-difluoroprop-1-ene                           | $\text{CHF}=\text{CF-CH}_3$                          | R-1252ye(Z)        | 2           | 380.7                      | 8.08 | 2.48                                         | retain                                           |
| 5708514                                            | (Z)-1,1,1,2,4,4,4-heptafluorobut-2-ene               | $\text{CF}_3\text{-CF=CH-CF}_3$                      | R-1327myz(Z)       | 2           | 381.0                      | 7.41 | 1.60                                         | low $Q_{\text{vol}}$ , drop                      |
| 69647                                              | 1,1,3,3,3-pentafluoropropene                         | $\text{CF}_2=\text{CH-CF}_3$                         | R-1225zc           | 4           | 381.2                      | 7.85 | 1.98                                         | low $Q_{\text{vol}}$ , drop                      |
| 5708720                                            | (E)-1,1,3,3,3-tetrafluoroprop-1-ene                  | $\text{CHF}=\text{CH-CF}_3$                          | R-1234ze(E)        | <1*         | 382.5†                     | 7.94 | 2.24                                         | commercialized                                   |
| 23237196                                           | (E)-1,2,3,3-tetrafluoroprop-1-ene                    | $\text{CHF}=\text{CF-CHF}_2$                         | R-1234ye(E)        | 2           | 382.7                      | 7.94 | 2.19                                         | low $Q_{\text{vol}}$ , drop                      |
| 5708673                                            | (Z)-1,2,3,3,3-pentafluoro-1-propene                  | $\text{CHF}=\text{CF-CF}_3$                          | R-1225ye(Z)        | <1*         | 384.0§                     | 7.85 | 1.91                                         | commercial interest                              |
| 521131                                             | 1,1-difluoroprop-1-ene                               | $\text{CF}_2=\text{CH-CH}_3$                         | R-1252zc           | 2           | 384.6                      | 8.14 | 2.34                                         | $\text{CF}_2$ alert, drop                        |
| 22956412                                           | 1,1,3-trifluoroprop-1-ene                            | $\text{CF}_2=\text{CH-CH}_2\text{F}$                 | R-1243zc           | 1           | 384.9                      | 8.09 | 2.25                                         | $\text{CF}_2$ alert, drop                        |
| 61109                                              | 1,1,3,3,3-pentafluoro-2-(trifluoromethyl)prop-1-ene  | $\text{CF}_2=\text{C-(CF}_3)_2$                      |                    | 2           | 386.6                      | 7.40 | 1.21                                         | highly toxic, low $Q_{\text{vol}}$ , drop        |
| 21731865                                           | 1,1,3,3-tetrafluoroprop-1-ene                        | $\text{CF}_2=\text{CH-CH}_2\text{F}$                 | R-1234zc           | 2           | 386.8                      | 8.03 | 2.05                                         | $\text{CF}_2$ alert, low $Q_{\text{vol}}$ , drop |
| 67745                                              | 1,1,2,3,3,4,4,4-octafluorobut-1-ene                  | $\text{CF}_2=\text{CF-CF}_2\text{-CF}_3$             |                    | 5           | 389.5                      | 7.41 | 1.21                                         | $\text{CF}_2$ alert, low $Q_{\text{vol}}$ , drop |
| 5463203                                            | (E)-1-fluoroprop-1-ene                               | $\text{CHF}=\text{CH-CH}_3$                          | R-1261ze(E)        | 1           | 390.7                      | 8.27 | 2.52                                         | retain                                           |
| 6432206                                            | (Z)-1-fluoroprop-1-ene                               | $\text{CHF}=\text{CH-CH}_3$                          | R-1261ze(Z)        | 1           | 390.7                      | 8.28 | 2.53                                         | retain                                           |
| 6329539                                            | (E)-1,2,3,3,3-pentafluoroprop-1-ene                  | $\text{CHF}=\text{CF-CF}_3$                          | R-1225ye(E)        | <1*         | 390.8§                     | 7.95 | 1.68                                         | low $Q_{\text{vol}}$ , drop                      |
| 21096859                                           | 1,1,3,3,4,4,4-heptafluorobut-1-ene                   | $\text{CF}_2=\text{CH-CF}_2\text{-CF}_3$             | R-1327zcz          | 2           | 391.2                      | 7.57 | 1.26                                         | low $Q_{\text{vol}}$ , drop                      |

Supplementary Table 1 (continued)

| PubChem Number                                                 | IUPAC Name                                              | Structure                                                             | ASHRAE Designation | GWP <sub>100</sub> | T <sub>crit</sub> /K | COP  | Q <sub>vol</sub> /MJ·m <sup>-3</sup> | Comments                                           |
|----------------------------------------------------------------|---------------------------------------------------------|-----------------------------------------------------------------------|--------------------|--------------------|----------------------|------|--------------------------------------|----------------------------------------------------|
| <b>Hydrofluoroolefins (HFOs) and Fluoroolefins (continued)</b> |                                                         |                                                                       |                    |                    |                      |      |                                      |                                                    |
| 3034116                                                        | (Z)-1,1,1,2,3,4,4,4-octafluorobut-2-ene                 | CF <sub>3</sub> -CF=CF-CF <sub>3</sub>                                | R-1318myy(Z)       | 2                  | 394.5                | 7.50 | 1.09                                 | low Q <sub>vol</sub> , drop                        |
| 2775851                                                        | (E)-1,1,1,2,3,4,4,4-octafluorobut-2-ene                 | CF <sub>3</sub> -CF=CF-CF <sub>3</sub>                                | R-1318myy(E)       | 5                  | 394.5                | 7.60 | 1.11                                 | low Q <sub>vol</sub> , drop                        |
| 70899                                                          | 2-fluoroprop-1-ene                                      | CH <sub>3</sub> -CF=CH <sub>2</sub>                                   | R-1261             | 2                  | 399.6                | 8.35 | 1.87                                 | low Q <sub>vol</sub> , drop                        |
| 5462921                                                        | (Z)-1,2-difluoroethene                                  | CHF=CHF                                                               | R-1132(Z)          | 1                  | 405.8§               | 8.44 | 2.10                                 | low Q <sub>vol</sub> , drop                        |
| 20496975                                                       | 2-(difluoromethyl)-1,1,3,3,3-pentafluoroprop-1-ene      | CF <sub>2</sub> =C(-CHF <sub>2</sub> )(-CF <sub>3</sub> )             |                    | 2                  | 408.6                | 7.82 | 0.93                                 | low Q <sub>vol</sub> , drop                        |
| 23237197                                                       | (Z)-1,2,3,3-tetrafluoroprop-1-ene                       | CHF=CF-CF <sub>2</sub>                                                | R-1234ye(Z)        | 1                  | 409.4                | 8.25 | 1.40                                 | low Q <sub>vol</sub> , drop                        |
| 12543097                                                       | (Z)-1,2,3,3,4,4,4-heptafluorobut-1-ene                  | CHF=CF-CF <sub>2</sub> -CF <sub>3</sub>                               | R-1327eyc(Z)       | 1                  | 409.6                | 7.79 | 0.88                                 | low Q <sub>vol</sub> , drop                        |
| 21096848                                                       | 1,1,2,3,4,4,4-heptafluorobut-1-ene                      | CF <sub>2</sub> =CF-CHF-CF <sub>3</sub>                               | R-1327cye          | 3                  | 411.2                | 7.82 | 0.96                                 | low Q <sub>vol</sub> , drop                        |
| 12980437                                                       | 2,3,3,4,4,4-hexafluorobut-1-ene                         | CH <sub>2</sub> =CF-CF <sub>2</sub> -CF <sub>3</sub>                  | R-1336fyc          | 1                  | 412.3                | 7.90 | 0.89                                 | low Q <sub>vol</sub> , drop                        |
| 594043                                                         | 1,1,2,3,3-pentafluoroprop-1-ene                         | CF <sub>2</sub> =CF-CHF <sub>2</sub>                                  | R-1225yc           | 4                  | 413.5                | 8.20 | 1.20                                 | low Q <sub>vol</sub> , drop                        |
| 12576087                                                       | 1,1,3,3,4,4,4-heptafluoro-2-(trifluoromethyl)but-1-ene  | CF <sub>2</sub> =C(-CF <sub>3</sub> )CF <sub>2</sub> -CF <sub>3</sub> |                    | 2                  | 415.5                | 7.40 | 0.55                                 | low Q <sub>vol</sub> , drop                        |
| 12633094                                                       | (E)-1,3,3,4,4,4-hexafluorobut-1-ene                     | CHF=CH-CF <sub>2</sub> -CF <sub>3</sub>                               | R-1336ezc(E)       | 1                  | 417.8                | 7.97 | 0.80                                 | low Q <sub>vol</sub> , drop                        |
| 2774880                                                        | 1,1,2,3,3,4,4-heptafluorobut-1-ene                      | CF <sub>2</sub> =CF-CF <sub>2</sub> -CHF <sub>2</sub>                 | R-1327cyc          | 4                  | 418.5                | 7.88 | 0.78                                 | CF <sub>2</sub> alert, low Q <sub>vol</sub> , drop |
| 88954                                                          | 1,1,2,3,4,4,4-heptafluoro-3-(trifluoromethyl)but-1-ene  | CF <sub>2</sub> =CF-CF(-CF <sub>3</sub> ) <sub>2</sub>                |                    | 4                  | 419.3                | 7.42 | 0.54                                 | CF <sub>2</sub> alert, low Q <sub>vol</sub> , drop |
| 11116025                                                       | (Z)-1,3,3,3-tetrafluoroprop-1-ene                       | CHF=CH-CF <sub>3</sub>                                                | R-1234ze(Z)        | <1*                | 423.3†               | 8.42 | 0.92                                 | low Q <sub>vol</sub> , drop                        |
| <b>Hydrofluoroolefins (Cyclic)</b>                             |                                                         |                                                                       |                    |                    |                      |      |                                      |                                                    |
| 23236045                                                       | 1,2,3-trifluorocyclopropene                             | c-CHF-CF=CF-                                                          |                    | <1                 | 353.7                | 7.58 | 3.97                                 | 3-member ring, drop                                |
| 13550690                                                       | 1,2,3,3-tetrafluorocyclopropene                         | c-CF=CF-CF <sub>2</sub> -                                             | R-C1214            | 1                  | 379.5                | 7.98 | 2.29                                 | unstable, drop                                     |
| 12767                                                          | 1,2,3,3,4,4-hexafluorocyclobutene                       | c-CF=CF-CF <sub>2</sub> -CF <sub>2</sub> -                            | R-C1316            | 1                  | 385.7                | 7.69 | 1.54                                 | low Q <sub>vol</sub> , drop                        |
| 12585099                                                       | 3-(difluoromethylidene)-1,1,2,2-tetrafluorocyclopropane | CF <sub>2</sub> =(-C-CF <sub>2</sub> -CF <sub>2</sub> -)              |                    | 2                  | 395.9                | 7.82 | 1.35                                 | low Q <sub>vol</sub> , drop                        |
| 23234747                                                       | 3,3-difluoro-1,2-bis(trifluoromethyl)cyclopropene       | c-CF <sub>2</sub> -C(-CF <sub>3</sub> )=C(-CF <sub>3</sub> )-         |                    | <1                 | 417.3                | 7.70 | 0.60                                 | low Q <sub>vol</sub> , drop                        |
| <b>Olefins with Chlorine or Bromine</b>                        |                                                         |                                                                       |                    |                    |                      |      |                                      |                                                    |
| 6594                                                           | 1-chloro-1,2,2-trifluoroethene                          | CClF=CF <sub>2</sub>                                                  | R-1113             | 12                 | 380.1                | 8.06 | 2.59                                 | CF <sub>2</sub> alert, drop                        |
| 102335                                                         | 2-chloro-1,1,3,3,3-pentafluoroprop-1-ene                | CF <sub>2</sub> =CCl-CF <sub>3</sub>                                  | R-1215xc           | 6                  | 395.8                | 7.90 | 1.38                                 | low Q <sub>vol</sub> , drop                        |
| 5463105                                                        | (E)-1-chloro-1,2-difluoroethene                         | CFCl-CHF                                                              | R-1112a            | 4                  | 402.5                | 8.38 | 1.84                                 | low Q <sub>vol</sub> , drop                        |
| 9664                                                           | 2-chloro-1,1-difluoroethene                             | CF <sub>2</sub> =CHCl                                                 | R-1122             | 4                  | 411.0                | 8.44 | 1.61                                 | CF <sub>2</sub> alert, low Q <sub>vol</sub> , drop |
| 11730                                                          | 1-bromo-1,2,2-trifluoroethene                           | CBrF=CF <sub>2</sub>                                                  | R-1113B1           | 6                  | 411.8                | 8.37 | 1.39                                 | CF <sub>2</sub> alert, low Q <sub>vol</sub> , drop |
| 13717712                                                       | (Z)-1-chloro-1,2,3,3,3-pentafluoroprop-1-ene            | CClF=CF-CF <sub>3</sub>                                               | R-1215yb(Z)        | 9                  | 420.6                | 8.14 | 0.88                                 | low Q <sub>vol</sub> , drop                        |
| 22714818                                                       | (E)-1-chloro-1,2,3,3,3-pentafluoroprop-1-ene            | CClF=CF-CF <sub>3</sub>                                               | R-1215yb(E)        | 10                 | 420.6                | 8.13 | 0.88                                 | low Q <sub>vol</sub> , drop                        |
| <b>Fluorinated Alkynes</b>                                     |                                                         |                                                                       |                    |                    |                      |      |                                      |                                                    |
| 69654                                                          | 1,1,1,4,4,4-hexafluorobut-2-yne                         | CF <sub>3</sub> C≡CCF <sub>3</sub>                                    |                    | 1                  | 320.8                | 4.80 | 3.22                                 | low COP, drop                                      |
| 136491                                                         | 1,2-difluoroethyne                                      | FC≡CF                                                                 |                    | 1                  | 328.4                | 6.64 | 8.35                                 | unstable, drop                                     |
| 69578                                                          | 3,3,3-trifluoroprop-1-yne                               | CH≡C-CF <sub>3</sub>                                                  |                    | 1                  | 363.3                | 7.74 | 3.66                                 | possibly stable, retain                            |
| 32759                                                          | fluoroethyne                                            | CF≡CH                                                                 |                    | 1                  | 403.7                | 8.41 | 2.43                                 | unstable, drop                                     |
| <b>Allenes</b>                                                 |                                                         |                                                                       |                    |                    |                      |      |                                      |                                                    |
| 136312                                                         | 1,1,3,3-tetrafluoropropa-1,2-diene                      | CF <sub>2</sub> =C=CF <sub>2</sub>                                    |                    | 36                 | 330.3                | 6.43 | 4.70                                 | CF <sub>2</sub> alert, drop                        |
| 21718125                                                       | 1,1,3-trifluoropropa-1,2-diene                          | CF <sub>2</sub> =C=CHF                                                |                    | 8                  | 362.1                | 7.77 | 3.48                                 | CF <sub>2</sub> alert, drop                        |
| 23235216                                                       | 1,1,3,4,4,4-hexafluorobuta-1,2-diene                    | CF <sub>2</sub> =C=CF-CF <sub>3</sub>                                 |                    | 7                  | 388.2                | 7.69 | 1.41                                 | CF <sub>2</sub> alert, low Q <sub>vol</sub> , drop |
| 10037                                                          | propa-1,2-diene                                         | CH <sub>2</sub> =C=CH <sub>2</sub>                                    |                    | 2                  | 390.3                | 8.32 | 2.58                                 | see main text                                      |
| 12636903                                                       | 1,1,4,4,4-pentafluoro-3-(trifluoromethyl)buta-1,2-diene | CF <sub>2</sub> =C=C(-CF <sub>3</sub> ) <sub>2</sub>                  |                    | 2                  | 412.8                | 7.62 | 0.68                                 | CF <sub>2</sub> alert, low Q <sub>vol</sub> , drop |
| <b>Ethers</b>                                                  |                                                         |                                                                       |                    |                    |                      |      |                                      |                                                    |
| 73947                                                          | trifluoro(methoxy)methane                               | CF <sub>3</sub> -O-CH <sub>3</sub>                                    | R-E143a            | 523*               | 377.9†               | 7.93 | 2.53                                 | retain                                             |
| 10975466                                                       | trifluoro(fluoromethoxy)methane                         | CF <sub>3</sub> -O-CH <sub>2</sub> F                                  | R-E134a            | 669                | 379.8                | 7.94 | 2.26                                 | unstable, drop                                     |
| 2777154                                                        | 1,1,1-trifluoro-2-(trifluoromethoxy)ethane              | CF <sub>3</sub> -CH <sub>2</sub> -O-CF <sub>3</sub>                   | R-E236fa1          | 679                | 394.1                | 7.72 | 1.23                                 | low Q <sub>vol</sub> , drop                        |
| 8254                                                           | methoxymethane                                          | CH <sub>3</sub> -O-CH <sub>3</sub>                                    | R-E170             | <1*                | 400.4†               | 8.31 | 2.79                                 | retain                                             |

**Supplementary Table 1 (continued)**

| PubChem Number                         | IUPAC Name                                                  | Structure                                                | ASHRAE Designation | GWP <sub>100</sub> | T <sub>crit</sub> /K | COP  | Q <sub>vol</sub> /MJ·m <sup>-3</sup> | Comments                                                          |
|----------------------------------------|-------------------------------------------------------------|----------------------------------------------------------|--------------------|--------------------|----------------------|------|--------------------------------------|-------------------------------------------------------------------|
| <b>Ether +Alkene</b>                   |                                                             |                                                          |                    |                    |                      |      |                                      |                                                                   |
| 9855459                                | 1-(trifluoromethoxy)ethene                                  | CF <sub>3</sub> -O-CH=CH <sub>2</sub>                    |                    | 1                  | 314.8                | 4.23 | 4.16                                 | low COP, drop                                                     |
| 14474                                  | 1,1,2-trifluoro-2-(trifluoromethoxy)ethene                  | CF <sub>3</sub> -O-CF=CF <sub>2</sub>                    |                    | 6                  | 358.8                | 7.05 | 2.43                                 | CF <sub>2</sub> alert, drop                                       |
| 14617222                               | 1,1,3,3,3-pentafluoro-2-(trifluoromethoxy)prop-1-ene        | CF <sub>3</sub> -C=CF <sub>2</sub> -O-CF <sub>3</sub>    |                    | 2                  | 361.7                | 6.63 | 1.77                                 | CF <sub>2</sub> alert, low Q <sub>vol</sub> , drop                |
| 21940994                               | 1-fluoro-1-(trifluoromethoxy)ethene                         | CF <sub>3</sub> -O-CF=CH <sub>2</sub>                    |                    | 1                  | 377.5                | 7.71 | 2.13                                 | low Q <sub>vol</sub> , drop                                       |
| 2783163                                | 1,1,2,3,3-pentafluoro-3-(trifluoromethoxy)prop-1-ene        | CF <sub>2</sub> =CF-CF <sub>2</sub> -O-CF <sub>3</sub>   |                    | 14                 | 387.9                | 7.23 | 1.16                                 | CF <sub>2</sub> alert, low Q <sub>vol</sub> , drop                |
| 14875812                               | (E)-1,2,3,3,3-pentafluoro-1-(trifluoromethoxy)prop-1-ene    | CF <sub>3</sub> -CF=CF-O-CF <sub>3</sub>                 |                    | 2                  | 388.0                | 7.24 | 1.09                                 | low Q <sub>vol</sub> , drop                                       |
| 45075659                               | (Z)-1,2,3,3,3-pentafluoro-1-(trifluoromethoxy)prop-1-ene    | CF <sub>3</sub> -O-CF=CF-CF <sub>3</sub>                 |                    | 2                  | 388.0                | 7.24 | 1.09                                 | low Q <sub>vol</sub> , drop                                       |
| 82672                                  | 1,1,1,2,2-pentafluoro-2-(1,2,2-trifluoroethenoxy)ethane     | CF <sub>2</sub> =CF-O-CF <sub>2</sub> -CF <sub>3</sub>   |                    | 4                  | 395.9                | 7.35 | 0.69                                 | low Q <sub>vol</sub> , drop                                       |
| 22292402                               | 1,1-difluoro-2,2-bis(trifluoromethoxy)ethene                | CF <sub>2</sub> =C(-O-CF <sub>3</sub> ) <sub>2</sub>     |                    | 1                  | 400.1                | 7.28 | 0.64                                 | CF <sub>2</sub> alert, low Q <sub>vol</sub> , drop                |
| 71405026                               | 1-[difluoro(trifluoromethoxy)methoxy]-1,2,2-trifluoroethene | CF <sub>2</sub> =CF-O-CF <sub>2</sub> -O-CF <sub>3</sub> |                    | 10                 | 401.2                | 7.29 | 0.82                                 | low Q <sub>vol</sub> , drop                                       |
| <b>Cyclic Ethers</b>                   |                                                             |                                                          |                    |                    |                      |      |                                      |                                                                   |
| 20271514                               | 2,2,4-trifluoro-1,3-dioxole                                 | c-CH=CF-O-CF <sub>2</sub> -O-                            |                    | 1                  | 375.7                | 7.83 | 2.08                                 | low Q <sub>vol</sub> , drop                                       |
| 69048191                               | 4-(difluoromethylidene)-2,2-difluoro-1,3-dioxetane          | CF <sub>2</sub> =(-C-O-CF <sub>2</sub> -O-)              |                    | 1                  | 377.4                | 7.69 | 1.94                                 | CF <sub>2</sub> alert, low Q <sub>vol</sub> , drop                |
| 12140230                               | 2,2,3,3,4,5-hexafluorofuran                                 | c-CF=CF-CF <sub>2</sub> -CF <sub>2</sub> -O-             |                    | 1                  | 388.2                | 7.62 | 1.44                                 | low Q <sub>vol</sub> , drop                                       |
| 69049115                               | 2,2-difluoro-4-(fluoromethylidene)-1,3-dioxetane            | CHF=(-C-O-CF <sub>2</sub> -O-)                           |                    | 1                  | 389.7                | 7.99 | 1.77                                 | low Q <sub>vol</sub> , drop                                       |
| 11744752                               | 2,2,4,5-tetrafluoro-1,3-dioxole                             | c-CF <sub>2</sub> -O-CF=CF-O-                            |                    | 1                  | 400.0                | 8.03 | 2.38                                 | retain                                                            |
| 23067819                               | 2,2,3-trifluoro-3-(1,2,2-trifluoroethenyl)oxirane           | CF <sub>2</sub> =CF-(-CF-O-CF <sub>2</sub> -)            |                    | 4                  | 402.6                | 7.75 | 1.17                                 | 3-member ring, CF <sub>2</sub> alert, low Q <sub>vol</sub> , drop |
| 17798504                               | 2-(difluoromethyl)-2,3,3-trifluorooxirane                   | CHF <sub>2</sub> -(-CF-O-CF <sub>2</sub> -)              |                    | 627                | 408.0                | 8.04 | 1.15                                 | low Q <sub>vol</sub> , drop                                       |
| <b>Oxygen (Ketenes)</b>                |                                                             |                                                          |                    |                    |                      |      |                                      |                                                                   |
| 136485                                 | 3,3,3-trifluoro-2-(trifluoromethyl)prop-1-en-1-one          | O=C=C-(CF <sub>3</sub> ) <sub>2</sub>                    |                    | 1                  | 388.0                | 7.58 | 1.38                                 | low Q <sub>vol</sub> , drop                                       |
| 21866237                               | 2-fluoroethenone                                            | O=C=CHF                                                  |                    | 1                  | 400.7                | 8.41 | 2.37                                 | non-fluor analog is toxic                                         |
| 54034777                               | 2,3,3,4,4,4-hexafluorobut-1-en-1-one                        | O=C=CF-CF <sub>2</sub> -CF <sub>3</sub>                  |                    | 1                  | 415.7                | 7.88 | 0.76                                 | low Q <sub>vol</sub> , drop                                       |
| <b>Oxygen (Peroxides)</b>              |                                                             |                                                          |                    |                    |                      |      |                                      |                                                                   |
| 23234511                               | (5S)-3,3,5-trifluoro-1,2,4-trioxolane                       | c-CF <sub>2</sub> -O-O-CHF-O-                            |                    | 537                | 389.7                | 8.03 | 1.79                                 | peroxide, low Q <sub>vol</sub> , drop                             |
| 18386358                               | difluoromethylperoxy(trifluoro)methane                      | CF <sub>3</sub> -O-O-CHF <sub>2</sub>                    |                    | 459                | 397.8                | 7.92 | 1.41                                 | peroxide, low Q <sub>vol</sub> , drop                             |
| 18469511                               | trifluoro(methylperoxy)methane                              | CF <sub>3</sub> -O-O-CH <sub>3</sub>                     |                    | 65                 | 419.4                | 8.25 | 1.03                                 | peroxide, low Q <sub>vol</sub> , drop                             |
| <b>Hypofluorites and Hypochlorites</b> |                                                             |                                                          |                    |                    |                      |      |                                      |                                                                   |
| 145297                                 | fluoronitrite                                               | FONO                                                     |                    | 77                 | 329.1                | 6.74 | 11.08                                | OF, drop                                                          |
| 25134276                               | [(Z)-1,2,3,3,3-pentafluoroprop-1-enyl] hypofluorite         | CF <sub>3</sub> CF=CF-OF                                 |                    | 2                  | 379.0                | 7.51 | 1.79                                 | OF, low Q <sub>vol</sub> , drop                                   |
| 17859950                               | difluoromethyl hypochlorite                                 | CHF <sub>2</sub> -O-Cl                                   |                    | 65                 | 380.0                | 8.16 | 3.40                                 | OCl, drop                                                         |
| 23379721                               | [difluoro(methoxy)methyl] hypofluorite                      | CH <sub>3</sub> -CF <sub>2</sub> -O-F                    |                    | 471                | 383.3                | 7.87 | 2.08                                 | OF, low Q <sub>vol</sub> , drop                                   |
| 20617073                               | 2,2-difluoroethenyl hypofluorite                            | CF <sub>2</sub> =CH-O-F                                  |                    | 1                  | 384.2                | 8.10 | 2.32                                 | CF <sub>2</sub> alert, OF, drop                                   |
| 57828726                               | [fluoro(trifluoromethoxy)methyl] hypofluorite               | CF <sub>3</sub> -O-CHF-O-F                               |                    | 61                 | 395.9                | 7.88 | 1.42                                 | low Q <sub>vol</sub> , drop                                       |
| 22084405                               | 1,2,2,2-tetrafluoroethyl hypofluorite                       | CF <sub>3</sub> -CHF-O-F                                 |                    | 65                 | 399.8                | 8.05 | 1.40                                 | low Q <sub>vol</sub> , drop                                       |
| 20089354                               | 1,1,1,3,3,3-hexafluoropropan-2-yl hypofluorite              | (CF <sub>3</sub> ) <sub>2</sub> -CH-O-F                  |                    | 85                 | 400.1                | 7.68 | 1.11                                 | low Q <sub>vol</sub> , drop                                       |
| 20600110                               | 1,2,2-trifluoroethenyl hypofluorite                         | CF <sub>2</sub> =CF-O-F                                  |                    | 2                  | 409.8                | 8.26 | 1.24                                 | CF <sub>2</sub> alert, OF, low Q <sub>vol</sub> , drop            |
| 59944631                               | 1,1,2,3,3-pentafluoroprop-2-enyl hypofluorite               | CF <sub>2</sub> =CF-CF <sub>2</sub> -O-F                 |                    | 8                  | 413.9                | 7.95 | 0.95                                 | CF <sub>2</sub> alert, low Q <sub>vol</sub> , drop                |
| 23576718                               | trifluoromethoxymethyl hypofluorite                         | CF <sub>3</sub> -O-CH <sub>2</sub> -O-F                  |                    | 12                 | 415.2                | 8.17 | 1.06                                 | low Q <sub>vol</sub> , drop                                       |
| 18381084                               | fluoromethyl hypofluorite                                   | FC-O-F                                                   |                    | 7                  | 415.3                | 8.50 | 1.76                                 | OF, low Q <sub>vol</sub> , drop                                   |

Supplementary Table 1 (continued)

| PubChem Number                                   | IUPAC Name                                                        | Structure                                               | ASHRAE Designation | GWP <sub>100</sub> | T <sub>crit</sub> /K | COP  | Q <sub>vol</sub> /MJ·m <sup>-3</sup> | Comments                                           |
|--------------------------------------------------|-------------------------------------------------------------------|---------------------------------------------------------|--------------------|--------------------|----------------------|------|--------------------------------------|----------------------------------------------------|
| <b>Oxygen (Miscellaneous)</b>                    |                                                                   |                                                         |                    |                    |                      |      |                                      |                                                    |
| 712                                              | formaldehyde                                                      | CH <sub>2</sub> =O                                      |                    | 1                  | 371.1                | 8.02 | 5.19                                 | toxic, drop                                        |
| 3013928                                          | 2,3,3-trifluoroprop-2-enoyl fluoride                              | CF(=O)-CF=CF <sub>2</sub>                               |                    | 11                 | 399.7                | 8.09 | 1.56                                 | low Q <sub>vol</sub> , drop                        |
| 58856309                                         | (Z)-1,3,3,3-tetrafluoroprop-1-en-1-ol                             | CF <sub>3</sub> -CH=CF-OH                               |                    | 1                  | 400.9                | 8.02 | 1.34                                 | low Q <sub>vol</sub> , drop                        |
| 12635489                                         | 3,3-difluoro-2-(trifluoromethyl)prop-2-enoyl fluoride             | CF-C(=O)-C(=CF <sub>2</sub> )-CF <sub>3</sub>           |                    | 5                  | 413.4                | 7.89 | 0.89                                 | CF <sub>2</sub> alert, low Q <sub>vol</sub> , drop |
| 67907                                            | 2,2,3,3,3-pentafluoropropanal                                     | CH(=O)-CF <sub>2</sub> -CF <sub>3</sub>                 |                    | 16                 | 413.5                | 8.06 | 0.93                                 | low Q <sub>vol</sub> , drop                        |
| 12524720                                         | 1,3,3,3-tetrafluoro-2-(trifluoromethyl)prop-1-en-1-ol             | OH-CF=C-(CF <sub>3</sub> ) <sub>2</sub>                 |                    | 1                  | 418.1                | 7.75 | 0.66                                 | low Q <sub>vol</sub> , drop                        |
| <b>Sulfur-containing (Thiols and Thioethers)</b> |                                                                   |                                                         |                    |                    |                      |      |                                      |                                                    |
| 19050251                                         | difluoromethanethiol                                              | CHF <sub>2</sub> -SH                                    |                    | 1                  | 373.0                | 8.07 | 4.01                                 | retain                                             |
| 30555                                            | trifluoromethanethiol                                             | CF <sub>3</sub> -SH                                     |                    | 1                  | 376.2                | 8.04 | 2.90                                 | retain                                             |
| 136206                                           | trifluoro(trifluoromethylsulfanyl)methane                         | CF <sub>3</sub> -S-CF <sub>3</sub>                      |                    | 3                  | 377.7                | 7.58 | 2.16                                 | low Q <sub>vol</sub> , drop                        |
| 4713114                                          | 1,1,2,2,2-pentafluoroethanethiol                                  | CF <sub>3</sub> -CF <sub>2</sub> -SH                    |                    | 1                  | 386.1                | 7.78 | 1.68                                 | low Q <sub>vol</sub> , drop                        |
| 23498413                                         | 2,2,2-trifluoroethanethiol                                        | CF <sub>3</sub> -CH=S                                   |                    | 7                  | 388.3                | 8.16 | 1.95                                 | low Q <sub>vol</sub> , drop                        |
| 19779344                                         | 1,1,1,2,2-pentafluoro-2-(trifluoromethylsulfanyl)ethane           | CF <sub>3</sub> -S-CF <sub>2</sub> -CF <sub>3</sub>     |                    | 3                  | 406.2                | 7.58 | 0.86                                 | low Q <sub>vol</sub> , drop                        |
| 54040926                                         | [difluoro(trifluoromethylsulfanyl)methyl]peroxy-trifluoromethane  | CF <sub>3</sub> -O-O-CF <sub>2</sub> -S-CF <sub>3</sub> |                    | 5                  | 413.4                | 7.39 | 0.66                                 | low Q <sub>vol</sub> , peroxide, drop              |
| <b>Nitrogen-containing (including Amines)</b>    |                                                                   |                                                         |                    |                    |                      |      |                                      |                                                    |
| 141139                                           | N,N,1,1-tetrafluoromethanamine                                    | CHF <sub>2</sub> -NF <sub>2</sub>                       |                    | 20                 | 341.6                | 7.16 | 5.24                                 | retain                                             |
| 140187                                           | N,N,N',N',N'',N''',N''',N'''-octafluoromethanetetramine           | C-(NF <sub>2</sub> ) <sub>4</sub>                       |                    | 898                | 367.6                | 6.75 | 1.45                                 | low Q <sub>vol</sub> , drop                        |
| 10214404                                         | N-(difluoromethyl)-N,1,1,1-tetrafluoromethanamine                 | CF <sub>3</sub> -NF-CHF <sub>2</sub>                    |                    | 49                 | 374.6                | 7.57 | 2.07                                 | low Q <sub>vol</sub> , drop                        |
| 144610                                           | N-(difluoromethyl)-1,1,1-trifluoro-N-(trifluoromethyl)methanamine | C <sub>3</sub> HF <sub>8</sub> N                        |                    | 64                 | 389.8                | 7.41 | 1.22                                 | low Q <sub>vol</sub> , drop                        |
| 23233616                                         | 2,3,3,3-tetrafluoro-N-(trifluoromethyl)prop-1-en-1-imine          | CF <sub>3</sub> -CF=C=N-CF <sub>3</sub>                 |                    | 1                  | 390.8                | 7.45 | 1.07                                 | low Q <sub>vol</sub> , drop                        |
| 13899145                                         | 2,3,4-trifluoroazete                                              | c-N-CF=CF-CF=N-                                         |                    | 1                  | 397.4                | 8.23 | 1.91                                 | low Q <sub>vol</sub> , drop                        |
| 9898808                                          | 2-diazo-1,1,1-trifluoroethane                                     | N=N=CH-CF <sub>3</sub>                                  |                    | 70                 | 398.4                | 8.18 | 1.54                                 | low Q <sub>vol</sub> , drop                        |
| 10220269                                         | 1,2,2-trifluoro-N,N-bis(trifluoromethyl)ethenamine                | CF <sub>2</sub> =CF-N-(CF <sub>3</sub> ) <sub>2</sub>   |                    | 11                 | 410.5                | 7.44 | 0.66                                 | low Q <sub>vol</sub> , drop                        |
| 23235599                                         | 2,2,2-trifluoro-N-(trifluoromethyl)ethanimine                     | CF <sub>3</sub> -CH=N-CF <sub>3</sub>                   |                    | 54                 | 417.1                | 8.01 | 0.83                                 | low Q <sub>vol</sub> , drop                        |
| <b>Inorganics</b>                                |                                                                   |                                                         |                    |                    |                      |      |                                      |                                                    |
| 280                                              | carbon dioxide                                                    | CO <sub>2</sub>                                         | R-744              | 1.00*              | 304.1†               | ‡    |                                      | blend component, retain                            |
| 222                                              | ammonia                                                           | NH <sub>3</sub>                                         | R-717              | <1*                | 405.4†               | 8.32 | 5.26                                 | retain                                             |
| <b>Current Fluids (HFCs, HCFCs, and Blends)</b>  |                                                                   |                                                         |                    |                    |                      |      |                                      |                                                    |
| 9633                                             | pentafluoroethane                                                 | CF <sub>3</sub> -CHF <sub>2</sub>                       | R-125              | 3170*              | 339.2†               | 6.84 | 4.78                                 |                                                    |
| n.a.                                             | R-125/143a (50.0/50.0)                                            | blend                                                   | R-507A             | 3985*              | 343.8†               | 7.14 | 4.70                                 |                                                    |
| n.a.                                             | R-32/125 (50.0/50.0)                                              | blend                                                   | R-410A             | 1924*              | 344.5†               | 7.41 | 6.62                                 |                                                    |
| n.a.                                             | R-125/134a/143a (44.0/4.0/52.0)                                   | blend                                                   | R-404A             | 3943*              | 345.7†               | 7.21 | 4.65                                 |                                                    |
| n.a.                                             | R-32/125/134a (23.0/25.0/52.0)                                    | blend                                                   | R-407C             | 1624*              | 359.3†               | 7.70 | 4.69                                 |                                                    |
| 6372                                             | chlorodifluoromethane                                             | CHClF <sub>2</sub>                                      | R-22               | 1760*              | 369.3†               | 7.97 | 4.58                                 |                                                    |
| 13129                                            | 1,1,1,2-tetrafluoroethane                                         | CF <sub>3</sub> -CH <sub>2</sub> F                      | R-134a             | 1300*              | 374.2†               | 7.96 | 2.99                                 |                                                    |
| 67940                                            | 1,1,1,2,3,3,3-heptafluoropropane                                  | CF <sub>3</sub> -CHF-CF <sub>3</sub>                    | R-227ea            | 3350*              | 374.9†               | 7.51 | 1.88                                 |                                                    |

\*Literature value from Myhre *et al.*<sup>2</sup> or E.U. regulation.<sup>3</sup>†Literature value from the NIST REFPROP database.<sup>4</sup>

‡Fluid would be near-critical or supercritical in the condenser and was not simulated.

§Value estimated from normal boiling point as discussed in Methods

### Supplementary References

1. Kazakov, A., McLinden, M. O., Frenkel, M. Computational design of new refrigerant fluids based on environmental, safety, and thermodynamic characteristics. *Ind. Eng. Chem. Res.* **51**, 12537-12548 (2012).
2. Myhre, G. *et al.* in *Climate Change 2013: The Physical Science Basis, Fifth Assessment Report of the Intergovernmental Panel on Climate Change.* (Cambridge University Press 2013).
3. European Parliament. Regulation (EU) No 517/2014 of the European Parliament and of the Council of 16 April 2014 on fluorinated greenhouse gases and repealing Regulation (EC) No 842/2006 (2014).
4. NIST Standard Reference Database 23, NIST Reference Fluid Thermodynamic and Transport Properties—REFPROP, version 9.1. (Standard Reference Data Program, National Institute of Standards and Technology, Gaithersburg, MD, 2013).
